# Supplementary material for: Morphological consequences of artificial cranial deformation: Modularity and integration
Source: PubMed Central journal article supplement (PMC6980596; doi:10.1371/journal.pone.0227362), 2020-01-24

## Symmetric component

## Asymmetric component

## a) Complete dataset

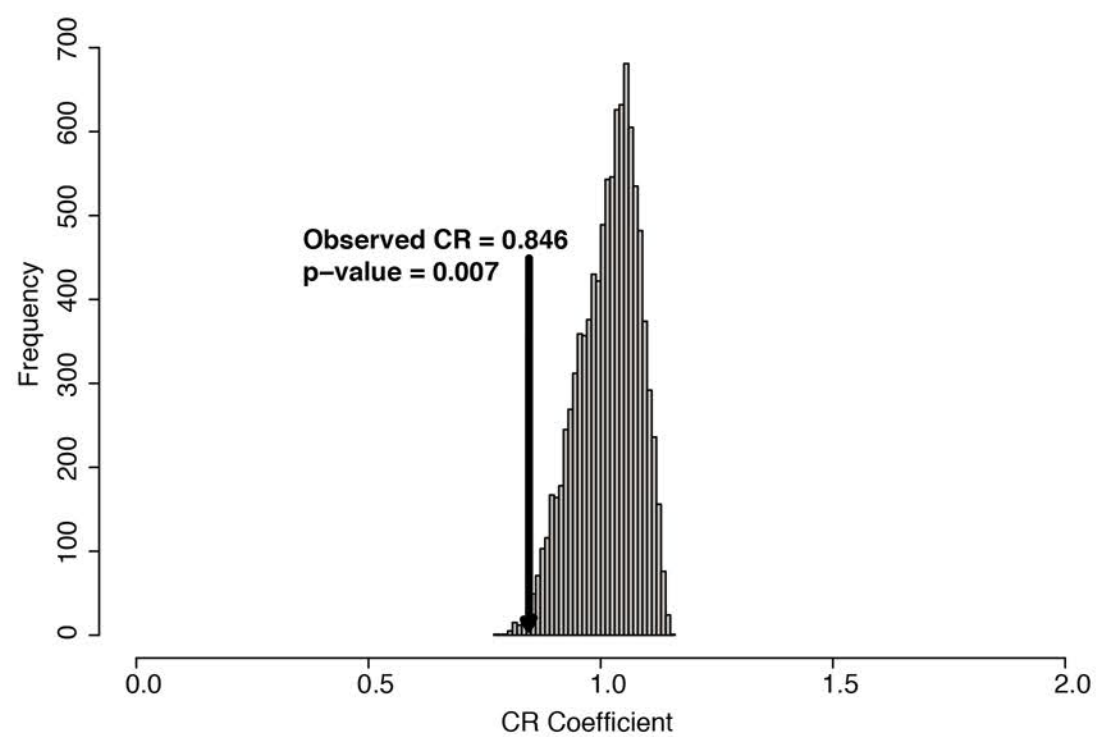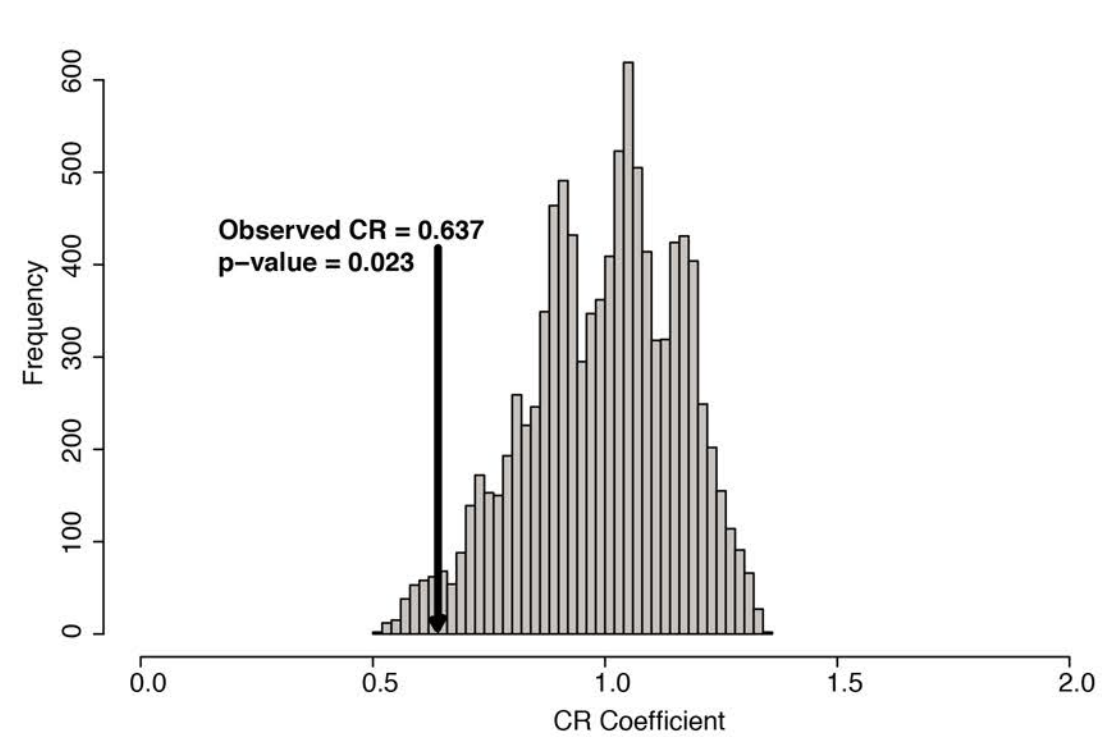

## b) Antero-posterior

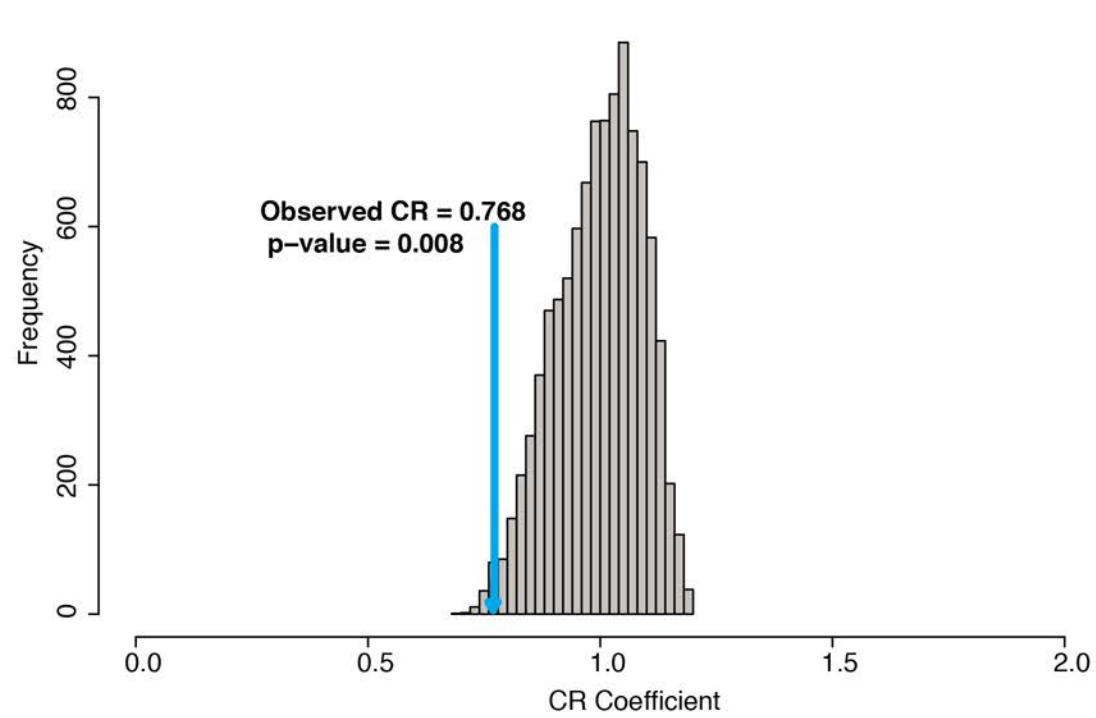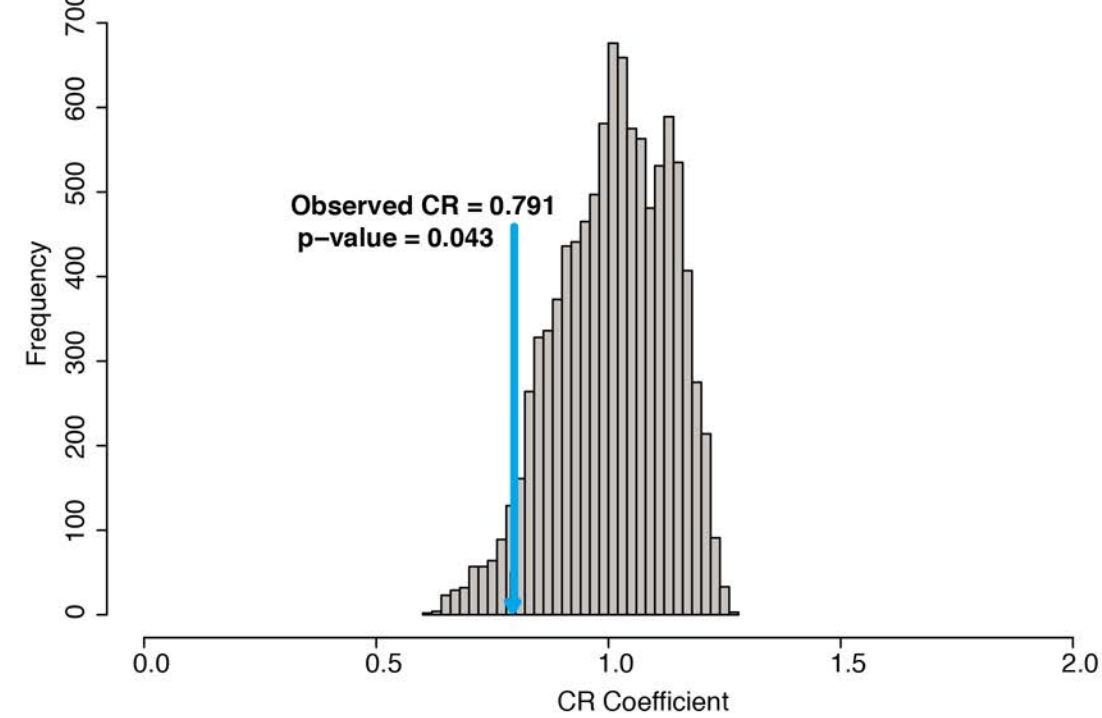

## c) Non-deformed

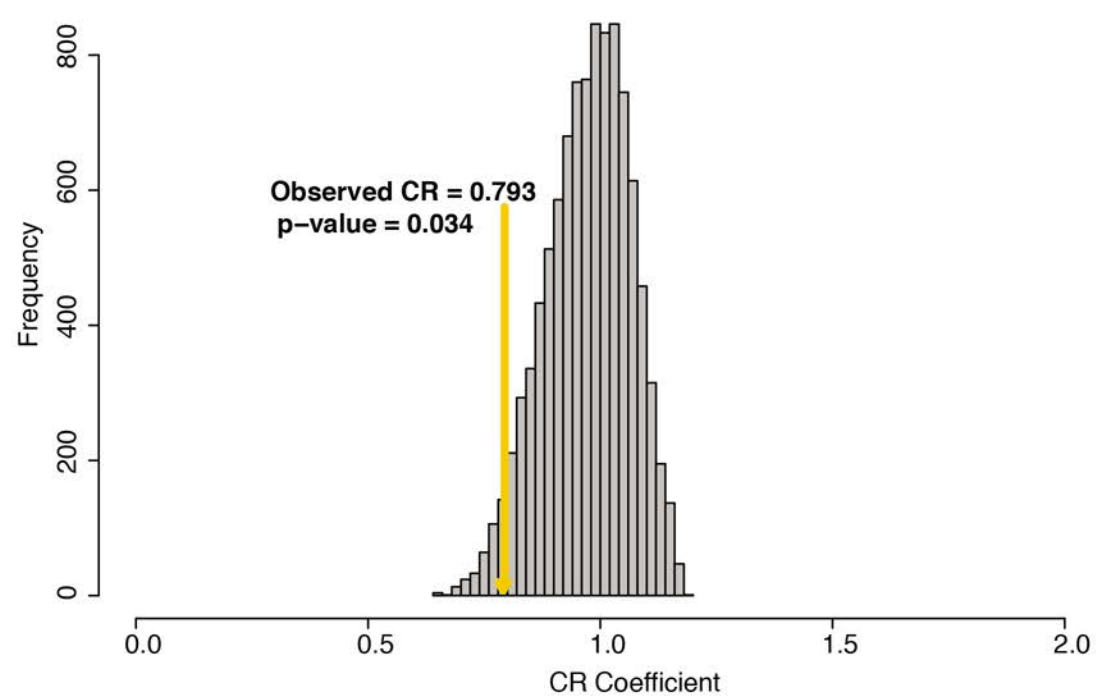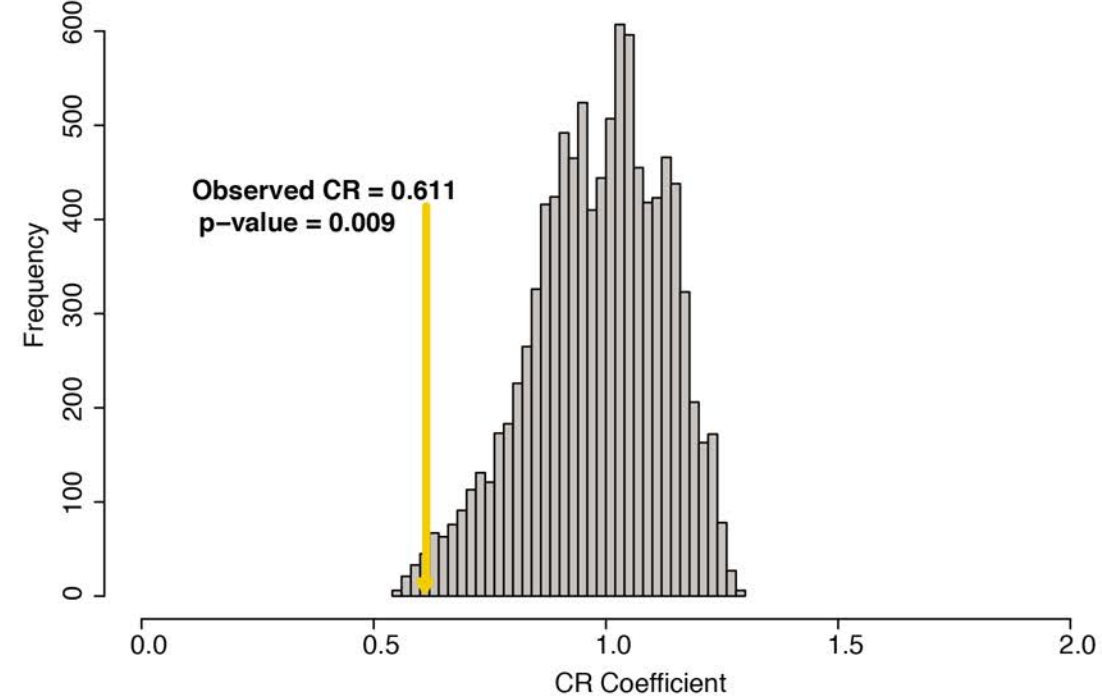

## d) Oblique

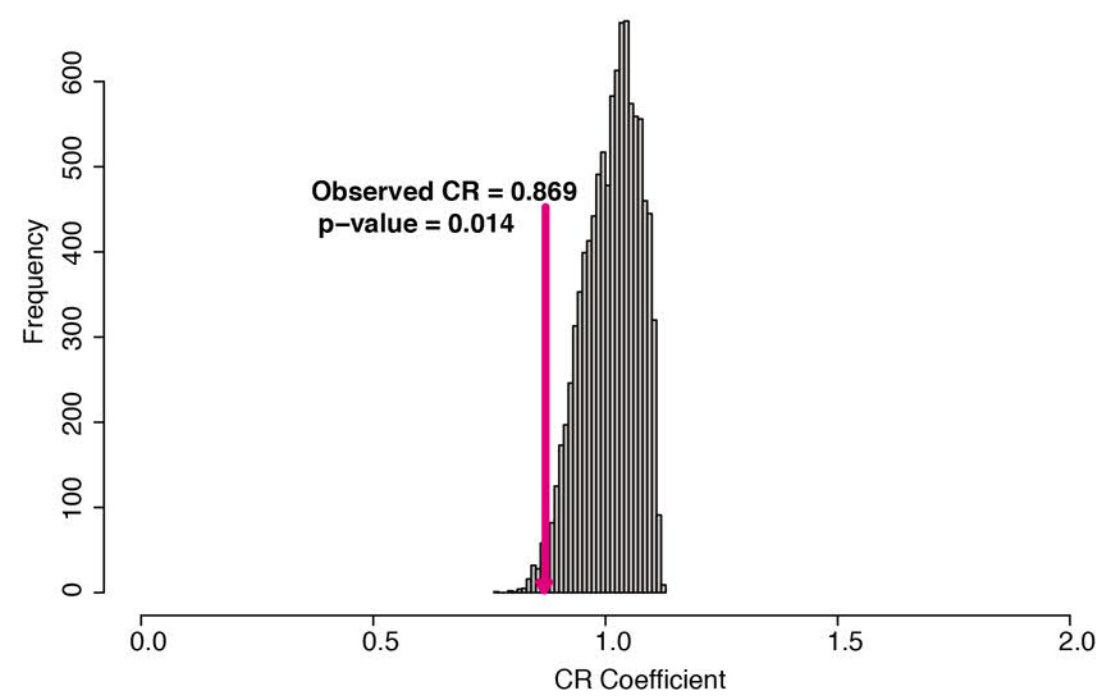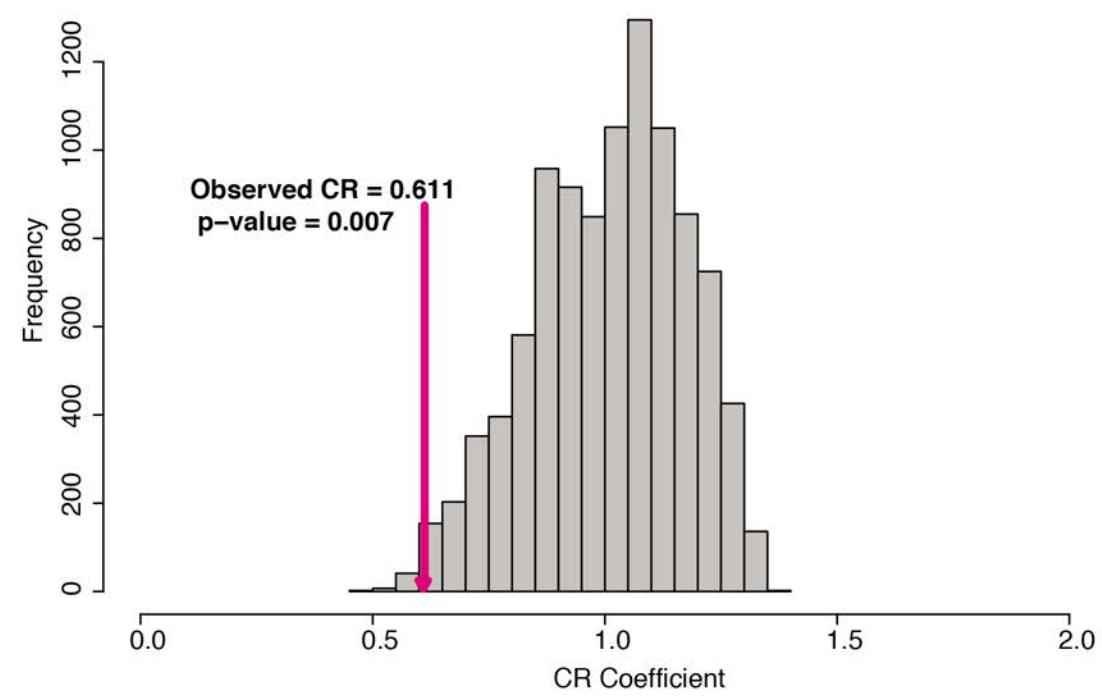

Supplement: pone.0227362.s004.pdf [file pone.0227362.s004.pdf]
