# Supplementary material for: Morphological consequences of artificial cranial deformation: Modularity and integration
Source: PubMed Central journal article supplement (PMC6980596; doi:10.1371/journal.pone.0227362), 2020-01-24

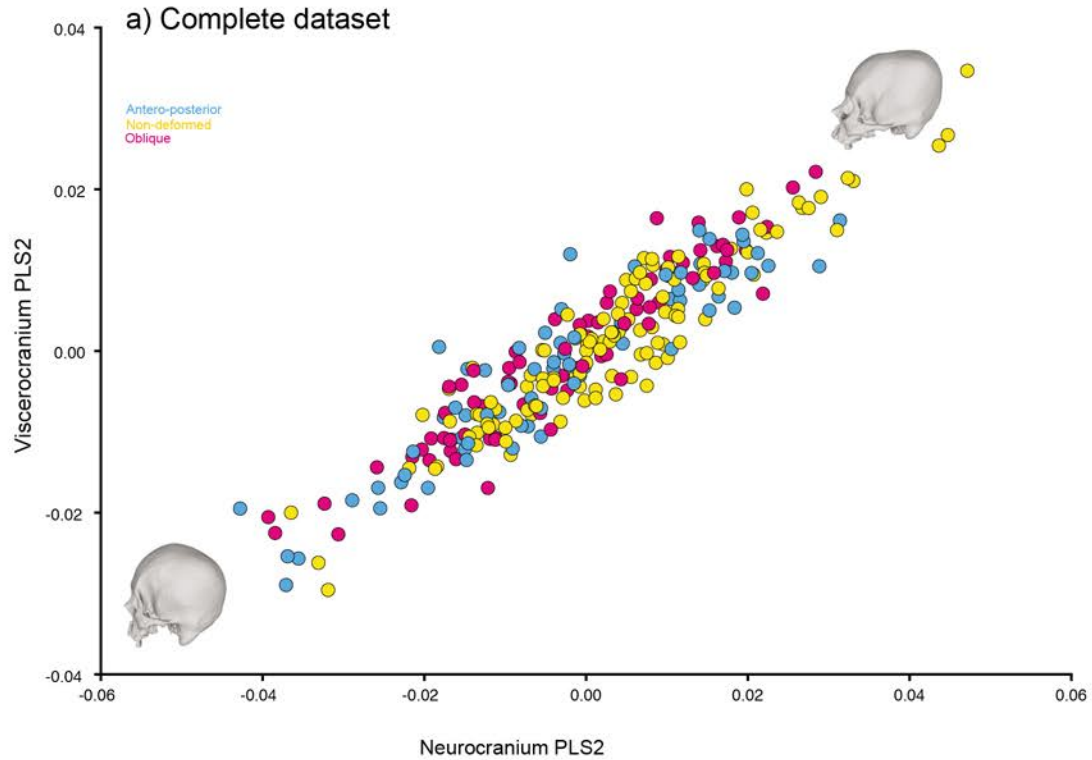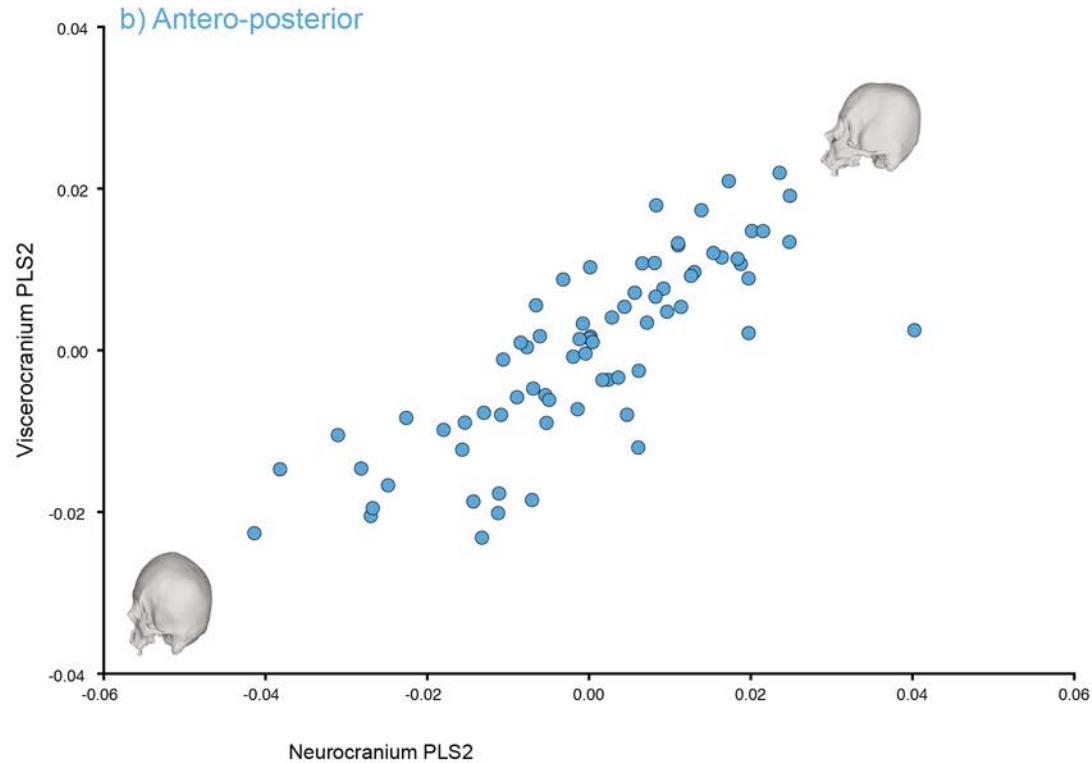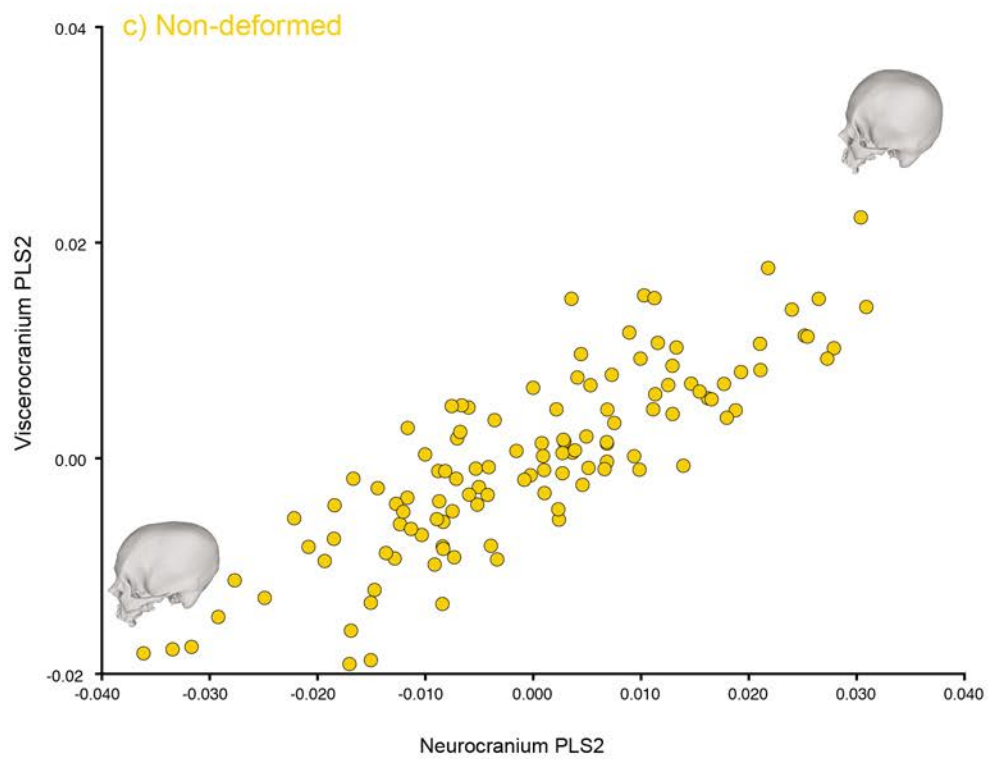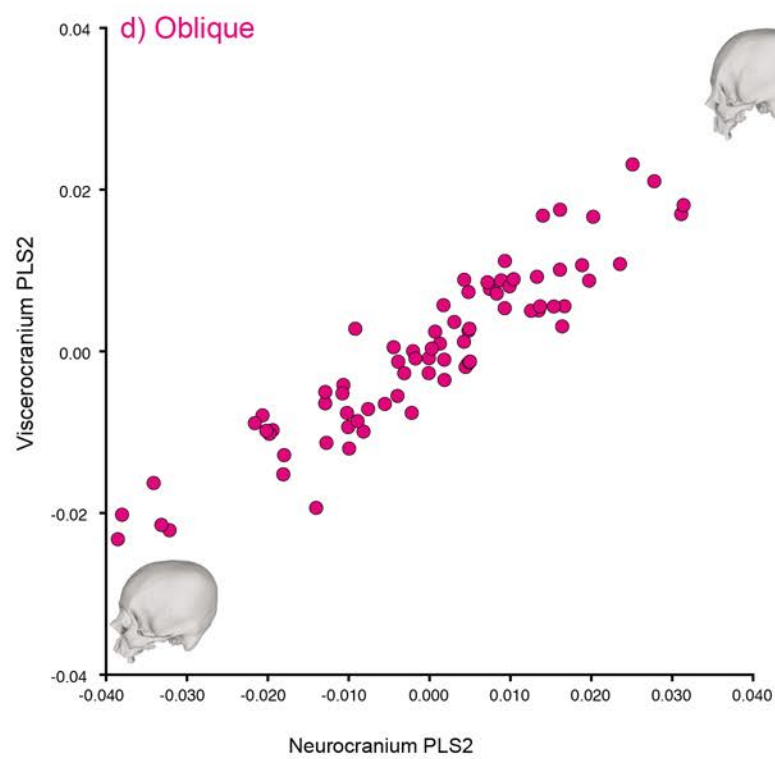

Supplement: pone.0227362.s005.pdf [file pone.0227362.s005.pdf]
