# Supplementary material for: Morphological consequences of artificial cranial deformation: Modularity and integration
Source: PLoS One. 2020 Jan 24;15(1):e0227362. doi: 10.1371/journal.pone.0227362 (PMC6980596; doi:10.1371/journal.pone.0227362)
Supplement: S3 Table — Linear Discriminant Analysis using the Procrustes coordinates of the first 11 PCs after a broken-stick model for 3 classes /'Antero-Posterior', 'Non.deformed', 'Oblique'/. (CSV) [file pone.0227362.s003.csv]

	Erect	Non.deformed	Oblique
Chorrillos_B7	0.000233416	5.04E-05	0.999716224
Chorrillos_B8	0.000101226	0.002243495	0.997655279
Chorrillos_B9	0.000494344	0.004731552	0.994774104
Chorrillos_B32	0.086076305	0.03149374	0.882429955
Chorrillos_B89	0.00076934	0.017953039	0.981277621
Chorrillos_B127	6.71E-05	0.01673511	0.983197752
Chorrillos_B128	0.000135408	0.055010645	0.944853947
Chorrillos_B134	0.000128358	0.002682258	0.997189384
Chorrillos_B140	7.22E-06	0.107709914	0.892282868
Chorrillos_B141	0.002370663	0.005322468	0.992306868
Chorrillos_B182	0.001379363	0.00136768	0.997252957
Chorrillos_B221	0.005886849	0.047072483	0.947040668
Chorrillos_B238	4.96E-05	6.89E-05	0.999881504
Chorrillos_B74	0.000504741	0.026401381	0.973093877
Chorrillos_B105	0.000162685	0.002197986	0.997639329
Chorrillos_B139	0.000477335	0.056456327	0.943066338
Chorrillos_B179	2.27E-05	0.153425808	0.846551524
Chorrillos_B186	6.63E-05	0.016348896	0.98358476
Chorrillos_B197	5.38E-05	0.013934281	0.986011947
Chorrillos_B252	3.96E-05	0.000759181	0.999201254
Calama_18157	0.846815275	0.061453619	0.091731106
Calama_18162	0.622239105	0.001222941	0.376537953
Chunchuri_529_02	0.813337005	0.045642987	0.141020008
Chunchuri_539_05	0.809711656	0.00170042	0.188587924
Chunchuri_549_01	0.331425341	0.000396576	0.668178083
Chunchuri_549_02	0.808083838	0.00514792	0.186768243
Chunchuri_539_07	0.004672545	0.929650456	0.065676999
Chunchuri_562_02	0.04629429	0.505942587	0.447763123
Calama_18158	0.036071325	0.318530878	0.645397797
Calama_18160	0.34051217	0.074427354	0.585060476
Chunchuri_540_07	0.011690038	0.230732195	0.757577767
Chunchuri_529_01	0.66257155	0.057938353	0.279490098
Chunchuri_537_01	0.576479089	0.086475126	0.337045785
Calama_18161	0.152722229	0.834387577	0.012890195
Chunchuri_535_01	0.010216747	0.986311242	0.003472011
Chunchuri_537_04	0.08319892	0.000745511	0.916055569
Chunchuri_562_01	0.685738238	0.084921865	0.229339898
Topater_582_01	0.433932502	0.023888276	0.542179222
Topater1_350_Ind2	0.735134416	0.000296639	0.264568945
Topater1_437	0.000429234	0.020750952	0.978819814
Topater_428	0.000543138	0.13368769	0.865769172
SN_499_(MascaraPuma)	0.025844216	0.346803271	0.627352513
Caspana_24-12111	0.004081087	0.930222949	0.065695963
Catarpe_2962-12795	0.000241826	0.952118805	0.047639369
Catarpe_2773-12581	0.049678482	0.946311842	0.004009676
Catarpe2_2766_12587	0.7698766	0.013971894	0.216151506
Catarpe2_1787_12637	0.005037067	0.992232263	0.00273067
Catarpe2_1803_12766	0.099452548	0.482731753	0.417815698
Catarpe2_1804_12619	0.001787983	0.996087948	0.002124069
Catarpe2_1840_12765	0.00877759	0.561578976	0.429643434
Catarpe2_1858_12699	0.001731885	0.80580853	0.192459585
Catarpe2_1889_12364	0.007586733	0.949016012	0.043397255
Catarpe2_2280_12666	0.005532607	0.903343154	0.091124239
Catarpe2_3015_12727	0.021178024	0.976197824	0.002624153
Catarpe2_3016_12642	0.181871127	0.490909969	0.327218904
Catarpe2_1812_12756	0.039232984	0.070726076	0.89004094
Catarpe2_1819_12761	0.656111637	0.146650873	0.19723749
Catarpe2_2311_12679	0.217501023	0.217224177	0.5652748
Catarpe2_2319_12739	0.007950826	0.297935898	0.694113276
Catarpe2_2984_12636	0.017103582	0.022333859	0.96056256
Catarpe2_3013_12624	0.087201399	0.617525305	0.295273296
Catarpe2_1810_12762	0.135651954	0.348302732	0.516045314
Catarpe2_2299_12639	0.422778023	0.512827078	0.064394899
Catarpe2_2777_12594	0.970073579	0.014253421	0.015673
Catarpe2_1733_12632	0.010751529	0.98025533	0.008993141
Catarpe2_1743_12610	0.016861708	0.946697279	0.036441014
Catarpe2_1762_12778	0.017509652	0.974042394	0.008447954
Catarpe2_1825_12805	0.082774716	0.89423358	0.022991704
Catarpe2_1846_12588	0.001191175	0.938319827	0.060488998
Catarpe2_1855_12689	0.002617402	0.959158867	0.038223731
Catarpe2_1869_12612	0.312383033	0.671194778	0.016422189
Catarpe2_1877_12675	0.002637342	0.986227149	0.011135509
Catarpe2_2287_12355	0.002213249	0.989226854	0.008559898
Catarpe2_2302_12660	0.079425437	0.699047466	0.221527097
Catarpe2_2320_12763	0.000126885	0.99336829	0.006504825
Catarpe2_2327_12764	0.142025035	0.849343731	0.008631234
Catarpe2_2776_12580	0.050742323	0.857854487	0.091403191
Catarpe2_3000_12621	0.001082525	0.97260298	0.026314494
Catarpe2_3014_12650	0.019891005	0.950849368	0.029259627
Catarpe2_3015_12654	0.013223622	0.844152226	0.142624152
Catarpe2_3020_12803	0.013013342	0.977662798	0.00932386
Catarpe_2765-12582	0.017682346	0.951606929	0.030710725
Catarpe_2764-12576	0.026303287	0.965027858	0.008668855
Catarpe_2770-12584	0.074381676	0.911924533	0.013693791
Catarpe2_1784_12622	0.013513074	0.345186942	0.641299984
Catarpe2_2315_12745	0.268038079	0.012863263	0.719098658
Catarpe2_2325_12655	0.021537491	0.06832468	0.910137829
Catarpe_3000-12621	0.001759255	0.959742434	0.038498311
Coyo3_T17-13285	0.982750574	0.010755689	0.006493736
Coyo3_3-13223	0.883303467	0.013437857	0.103258677
Coyo3_13-13304	0.274249623	0.710053686	0.015696691
Coyo3_28-13352	0.554616628	0.441609824	0.003773548
Coyo3_1-13208	0.00669355	0.934473353	0.058833097
Coyo3_18-13318	0.500207206	0.451278615	0.048514178
CoyO_3979-13553	0.981852459	0.015620455	0.002527085
CoyO_4004-9784	0.982641626	0.010636985	0.006721389
CoyO_4119-10037	0.982421877	0.011740535	0.005837589
CoyO_4150-9932	0.998941778	0.000327966	0.000730256
CoyoO_5306-9803	0.969049139	0.030643887	0.000306974
CoyO_4078-9824	0.961513066	0.037464975	0.001021959
CoyoO_5317-9806	0.033492764	0.694110611	0.272396625
CoyO_4022-9782	0.034170751	0.964265092	0.001564157
CoyO_4147-9982	0.036027231	0.923108957	0.040863812
CoyO_4137-9942	0.082123508	0.583710953	0.334165539
CoyO_4049-9870	0.323963893	0.650371057	0.02566505
CoyoO_4164-9779	0.924485038	0.0718143	0.003700662
CoyO_3945-10036	0.610090539	0.354369852	0.035539609
CoyO_5373-9950	0.01012476	0.989215404	0.000659837
CoyO_3942-10028	0.000335473	0.998021785	0.001642741
CoyO_4006-9840	0.002724645	0.988977291	0.008298064
CoyO_4041-9865	0.000392225	0.992556143	0.007051632
CoyO_4090-10042	0.024532641	0.876683562	0.098783797
CoyO_4129-11453	0.026087783	0.834828566	0.139083651
CoyO_4092-9789	0.001124045	0.961732083	0.037143872
CoyO_4180-9809	9.58E-05	0.99663686	0.003267369
CoyO_4093-10041	0.013126147	0.895079751	0.091794102
Larache_361_10106	0.725826625	0.216398877	0.057774499
Larache_359_14671	0.497743224	0.358744134	0.143512642
Larache_222_11077	0.00076619	0.986237317	0.012996493
Larache_220_11075	0.050655525	0.930296812	0.019047663
Larache_129_11072	0.269814028	0.635437682	0.09474829
Larache_sn_10753	0.860810397	0.127055861	0.012133742
Larache_118_13020	0.255875831	0.115682717	0.628441452
Larache_3799_14154	0.399215054	0.418841741	0.181943205
Larache_390_10754	0.072374829	0.818386546	0.109238625
Larache_360_10755	9.04E-05	0.999649878	0.000259753
Larache_218_11079	0.010162926	0.977032301	0.012804773
Larache_121_11076	0.00491367	0.98635134	0.00873499
Larache_117_11073	0.004482672	0.979680984	0.015836344
Larache_116_10757	0.000975922	0.965673904	0.033350174
Larache_114_11078	0.261358604	0.71982306	0.018818336
Quitor5_3392_9715	0.000777864	0.895484537	0.103737599
Quitor5_2100_9775	0.01167586	0.97965415	0.00866999
Q5_2182-9703	0.03486251	0.887195383	0.077942107
Q6_T10-104	0.014586084	0.979111058	0.006302859
Quitor6_T17-0222	0.732139037	0.185960484	0.081900479
Quitor6_T29-3264	0.026367932	0.967039423	0.006592645
Q6_T8-80	0.007428163	0.897642947	0.09492889
Quitor6_T14-0471	0.994210527	0.003635552	0.002153921
Q6_T24-0700	0.007068125	0.894893753	0.098038122
Q6_T27-0871	0.0015644	0.995020513	0.003415087
Q6_T30-0339	0.534123021	0.034085125	0.431791854
Q6_T51-0655	0.04905602	0.894939256	0.056004724
Seq_Alam_408-10527	0.084246769	0.607390612	0.30836262
Seq_Alam_659-10622	0.000244687	0.995336766	0.004418547
Seq_Alam_775-10703	0.000378266	0.997970566	0.001651167
Seq_Alam_725-10676	0.039141653	0.867860955	0.092997392
Seq_Alambrado_405-10497	0.102119987	0.648771959	0.249108055
SeqAlambrado_512-10561	0.210739409	0.550134024	0.239126567
SeqAlamOrient_1679-11839	0.827763604	0.168582801	0.003653595
Seq_AlamO_1303-11836	0.002215762	0.990086774	0.007697465
Seq_AlamO_1678-11830	0.012977453	0.919688724	0.067333823
Seq_AlamO_1682-11855	0.006508901	0.903494146	0.089996953
Seq_AlamO_1703-10738	0.219774438	0.6297892	0.150436362
SeqAlamOrient_1660-11852	0.897548285	0.093969002	0.008482714
SeqAlamOrient_1665-11838	0.998105847	0.001740511	0.000153642
Seq_AlamO_1618-11943	0.787425016	0.210112159	0.002462825
Seq_AlamO_1666-11538	0.109699088	0.869518421	0.020782491
Solcor_111-3605	0.9379813	0.008151627	0.053867073
Solcor_111-3606	0.817129551	0.029157866	0.153712584
Solcor_T6-1080	0.907617208	0.074807168	0.017575625
Solcor_T58-2269	0.832585289	0.090190744	0.077223967
Solcor_97-3589	0.909264735	0.013245238	0.077490027
Solcor_T30-1683	0.00379677	0.99130283	0.0049004
Solcor_115-3608	0.188010464	0.636018595	0.175970941
Solcor_50-1948	0.900977979	0.096781452	0.002240569
Solcor_76-3086	0.207351229	0.784346221	0.00830255
Solcor_107-13118	0.961298382	0.03533171	0.003369908
Solcor_56-2150	0.488156736	0.492922743	0.018920521
Solcor_69-2476	0.647812529	0.34134269	0.010844781
Solcor3_T58-2269	0.871162656	0.080717495	0.048119849
Solcor3_441-10874	0.986984947	0.007211296	0.005803757
Solcor3_T23-1536	0.953014087	0.014655301	0.032330613
Solcor3_T62-2367	0.021388552	0.742134479	0.236476969
Solcor3_117-13156	0.029969431	0.789670777	0.180359792
Solcor3_119_13586	0.000200108	0.997334706	0.002465186
Solcor3_T79-2762	0.07851308	0.859039492	0.062447428
Solcor3_T21-1516	0.164264166	0.062966941	0.772768893
Solcor3_T115-3608	0.214236275	0.331132675	0.45463105
Solcor3_T115-3609	0.217283986	0.264672398	0.518043617
Solcor3_65-2396	0.508389534	0.46454011	0.027070356
Solcor3_T84-2883	0.001243583	0.968277543	0.030478874
Solcor3_2-986	0.00172524	0.99152648	0.00674828
Solcor3_19-1447	0.007319446	0.915084701	0.077595853
Solcor3_T20-1455	0.03662069	0.832740006	0.130639304
Solcor3_978-10868	0.055129981	0.249619676	0.695250343
Solcor3_T20-1456	0.083626159	0.367233777	0.549140065
Solor3_930_10869	0.003310172	0.989162508	0.00752732
Solor3_315_10831	0.029202936	0.471763858	0.499033206
Solor3_1018_10882	0.481003782	0.085283283	0.433712935
Solor3_1039_10859	0.338268265	0.33695299	0.324778745
Solor3_441_10874	0.969139138	0.017199011	0.013661851
Solor3_913_10864	0.115871133	0.872747865	0.011381002
Tchecar_Tumulo_Sur_817	0.954668523	0.035610597	0.00972088
Tchecar_Tumulo_Sur_796	0.999282615	0.00034524	0.000372145
Tchecar_11301	0.631796441	0.220462186	0.147741372
Tchecar_11289	0.999730171	0.000166198	0.000103631
Tchecar_11252	0.999731478	2.80E-05	0.00024049
Tchecar_1152_11153	0.688147564	0.000436246	0.31141619
Tchecar_840_11156	0.998731362	0.000873569	0.000395069
Tchecar_822_11277	0.997996384	0.00125404	0.000749576
Tchecar_11318	0.409690955	0.530970987	0.059338058
Tchecar_11308	0.00486626	0.957757098	0.037376642
Tchecar_11146	0.000368319	0.997964299	0.001667382
Tchecar_11145	0.044508307	0.566060941	0.389430752
Tchecar_135_11171	0.081574652	0.58215321	0.336272138
Tchecar_1156_11227	0.059620502	0.223936426	0.716443072
Tchecar_Sur_331	0.918344618	0.039469513	0.042185869
Tchecar_12210	0.999406943	3.61E-06	0.00058945
Tchecar_11178	0.987169753	0.01182698	0.001003267
Tchecar_11169	0.985245595	0.012956294	0.001798112
Tchecar_11316	0.00036594	0.996543097	0.003090964
Tchecar_11138	0.000641477	0.833518768	0.165839755
Tchecar_11137	0.003167629	0.924526757	0.072305614
Tchecar_685_12199	0.00366402	0.958516939	0.037819041
Tchilimoya_11920	0.901185346	0.082293621	0.016521032
Tchilimoya_11904	0.980617553	0.001154341	0.018228106
Tchilimoya_11879	0.890621027	0.059099958	0.050279016
Tchilimoya_12039	0.235047448	0.373803481	0.391149072
Tchilimoya_11918	0.007088853	0.940882831	0.052028316
Tchilimoya_11913	0.017102257	0.899674261	0.083223482
Tchilimoya_11907	0.112744428	0.83615929	0.051096282
Tchilimoya_11895	0.006238845	0.906224474	0.087536681
Tchilimoya_11884	0.568707649	0.358335833	0.072956518
Tchilimoya_11880	0.001776297	0.84600907	0.152214633
Tchilimoya_11876	0.005891385	0.923927553	0.070181062
Tchilimoya_11095	0.004369863	0.952813328	0.042816809
Tchilimoya_11887	0.066162052	0.39524319	0.538594758
Tchilimoya_11917	0.605693495	0.37658894	0.017717565
Tchilimoya_11915	0.620911808	0.3259347	0.053153492
Tchilimoya_11890	0.122695584	0.723035381	0.154269034
Tchilimoya_11912	0.139368095	0.556242643	0.304389262
Tchilimoya_11900	0.152391556	0.403701917	0.443906527
Tchilimoya_11898	0.12164352	0.455957027	0.422399454
Toconao_4745-13078	0.005428795	0.943483201	0.051088004
Toconao_4666-11916	0.001000079	0.959732382	0.039267539
Toconao_237-11753	0.001169015	0.983581028	0.015249956
ToconaoOriente_4590_11686	0.603184343	0.187411325	0.209404332
ToconaoOriente_335_11754	0.953515843	0.016914243	0.029569914
ToconaoOrien_4203-11679	0.00010269	0.997144486	0.002752824
ToconaoOriente_171_11588	0.357676194	0.018905941	0.623417865
Toconce_80-11258	0.204290118	0.589137939	0.206571943
Caspana_18_11629	0.41352218	0.412454964	0.174022856
Caspana_35_11621	0.74535694	0.000899891	0.253743169
Caspana_26-11604	0.17213981	0.821745603	0.006114588
Caspana_25_11632	0.007785881	0.495033412	0.497180707
Caspana_13_11649	0.1008429	0.000656254	0.898500846
Caspana_27_11605	0.141801763	0.004540276	0.853657961
Caspana_38_11620	0.005001623	0.039113931	0.955884446
Caspana_41_11612	0.007240246	0.002298063	0.990461691
Caspana_47_11609	0.049451682	0.019227679	0.931320639
Caspana_69_11648	0.312451229	0.003103706	0.684445065
Caspana_9-11652	0.026457476	0.060841505	0.912701019
Caspana_52_11638	0.791932473	0.063909429	0.144158099
Caspana_54_12108	0.96634886	0.004542496	0.029108644
Caspana_21_11651	0.001834319	0.882686255	0.115479426
Caspana_24_12111	0.013982924	0.801872006	0.18414507
Caspana_26_11604	0.131783309	0.862393872	0.005822819
Caspana_9_11652	0.01574336	0.046460927	0.937795713
Caspana_29_11603	0.019242192	0.027177032	0.953580776
Caspana_39_11650	0.386977275	0.026621411	0.586401314
Caspana_50_11633	0.792759575	0.032342668	0.174897757
Caspana_56_11630	0.012685433	0.116555773	0.870758794
Caspana_59_12113	0.197173417	0.006489282	0.796337301
Caspana_63_12096	0.231596723	0.196312186	0.572091091
Caspana_64_11625	0.498844879	0.053580892	0.447574229
Caspana_21-11651	0.074544297	0.486481631	0.438974072
Toconce_77-12070	0.697262661	0.060025519	0.24271182
Toconce_91-12072	0.006329679	0.359787105	0.633883216
